# Supplementary material for: Unveiling of Concealed Processes for the Degradation of Pharmaceutical Compounds by Neopestalotiopsis sp
Source: MDPI journal article supplement (doi:10.3390/microorganisms7080264), 2019-08-16
Supplement: s1 [file s1]

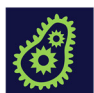

**Table S1.** Sampling site, strain, and diameters of green-colored halo zone from each strain on ABTS agar plates. Diameters of halo zone indicate the laccase activity. Data are presented as means  $\pm$  standard deviations from triplicates.

| Sampling Site  | Strain | Diameter (mm) |
|----------------|--------|---------------|
| Mae Mountain   | B1A    | 33 ( $\pm$ 1) |
|                | B2B *  | 35 ( $\pm$ 2) |
|                | B4A    | 31 ( $\pm$ 1) |
|                | B7A    | 32 ( $\pm$ 2) |
| Dukga Mountain | D1A    | 14 ( $\pm$ 0) |
|                | D3A    | 23 ( $\pm$ 1) |
|                | D4A    | 31 ( $\pm$ 2) |
|                | D17C   | 24 ( $\pm$ 1) |
|                | D17B   | 26 ( $\pm$ 2) |

\* B2B was finally selected for further study.
